# Supplementary material for: Generation of high-affinity, internalizing anti-FGFR2 single-chain variable antibody fragment fused with Fc for targeting gastrointestinal cancers
Source: PubMed Central journal article supplement (PMC5805272; doi:10.1371/journal.pone.0192194), 2018-02-08
Supplement: pone.0192194.s001.pdf [file pone.0192194.s001.pdf]

# SUPPORTING INFORMATION

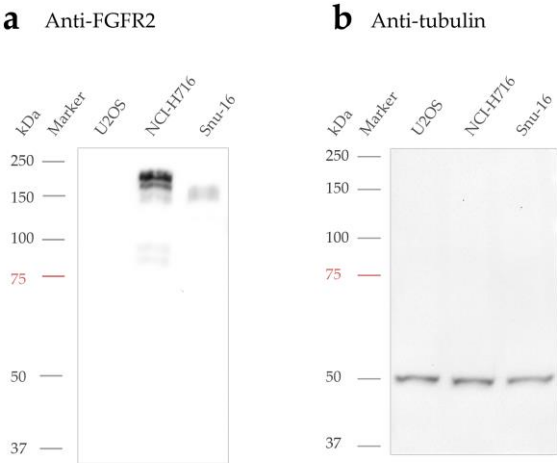

**S1 Fig.** FGFR2 expression at the protein level. Total cell lysates separated by SDS-PAGE, transferred to the membrane, probed with (a) FGFR2 specific antibodies and visualized with chemiluminescent substrate. Equal loading was confirmed by antibodies specific for tubulin (b).
